1            ***Heteractis magnifica* Sea Anemone Population Dynamics at**  
2            **Village Reef, Perhentian Kecil, Malaysia: Monitoring of Growth,**  
3            **Formations, and Hosting**  
4            **Status.**

5  
6            **Melissa Versteeg<sup>1\*</sup>, Alanah Campbell<sup>1</sup> & Hidayah Halid<sup>1</sup>**

7  
8            <sup>1</sup> Perhentian Marine Research Station, Pulau Perhentian, Terengganu, Malaysia.

9  
10           **\*Correspondence:**

11           mversteeg5@gmail.com

12  
13           **Keywords:** *Heteractis Magnifica*, Population Dynamics, Sea Anemone Aggregates,  
14           Coral Reefs, Malaysia.

15  
16           **ABSTRACT:** The coastal waters of Malaysia have been known to allow proliferation of sea anemone  
17           assemblages, which are resident species of tropical coral reefs. Along the Perhentian Islands of  
18           Terengganu, no efforts have been made thus far to investigate the presence and population dynamics  
19           of sea anemone assemblages locally. In this study, *Heteractis magnifica* assemblages at Village Reef  
20           at Perhentian Kecil were monitored during May, July, and August of 2020, thus providing a first  
21           assessment of their abundance. Sea anemone formation size, individual size, habitat location, and  
22           hosting status of anemonefish were assessed. Results demonstrate significantly larger counts of  
23           individuals within aggregated formations in the patch reef as compared to the fringe reef, without the  
24           presence of larger individual sizes. In addition, *Heteractis magnifica* specimens that were actively  
25           hosting anemonefish had significantly larger cover, larger individual sizes, and demonstrated higher  
26           individual counts within their aggregated formations compared to non-hosting specimens. There was  
27           no significant overall effect of time on sea anemone growth throughout the monitoring period, nor  
28           were there any significant changes in abundance levels regarding formation make-up throughout the  
29           monitoring phase. However, time related effects were present upon data inspection per assessment  
30           period. The restricted time frame of the monitoring period could play a role in explaining the absence  
31           of overall time related effects. A prolonged monitoring will help to further understand *Heteractis*  
32           *magnifica* population dynamics at this location, which can increase knowledge capacity for reef  
33           management and conservation strategies.

## 34 INTRODUCTION

35 The sea anemones' (*Actiniaria*) ability to reproduce asexually, and their lack of skeletal structure  
36 allows rapid formation and community expansion in suitable environments (Steinberg *et al.* 2020). Sea  
37 anemones can continually produce viable nodules for colonisation of neighbouring patches, where,  
38 given favourable environmental factors, sexual reproduction is actively suppressed in favour of rapid,  
39 asexual colonisation (Brace & Quicke 1986). Environmental parameters that influence sea anemone  
40 abundance and growth include temperature, seasonal effects, radiance and nutrient loadings,  
41 pollutants, and depth (Brolund *et al.* 2004; Chomsky *et al.* 2004; Holbrook & Schmitt 2005; Muller-  
42 Parker & Davy 2001; Thomas *et al.* 2014). Furthermore, when in the presence of live coral, sea  
43 anemones have been found to demonstrate higher expansion rates and will utilize aggressive strategies  
44 towards neighbouring corals during competition over suitable substrate (Liu *et al.* 2009).

45  
46 To the east of peninsular Malaysia, the coral reef habitats of the Perhentian Islands have undergone  
47 dramatic changes in previous years (Islam *et al.* 2013). Longitudinal monitoring demonstrates a  
48 profound drop in live coral cover, with the 2008 averages calculated at 50.74%, whilst a mere 35.50%  
49 of the reefs contained live coral cover by 2019 (Reef Check Malaysia 2008; Reef Check Malaysia  
50 2018). Furthermore, a sharp rise in tourism (Department of Marine Park Malaysia 2016) with  
51 subsequent increases in infrastructure development, tourism impacts, and changes to water quality, are  
52 negatively influencing the environmental quality of the Perhentian Islands  
53 (Nasir *et al.* 2017; Kurniawam *et al.* 2016). Although research focusses on monitoring changes in coral  
54 states throughout the Perhentian Islands, no studies to date are monitoring changes in sea anemone  
55 distribution patterns.

56  
57 To protect Perhentian coral reefs from degradation and to stimulate coral recovery, the Perhentian  
58 Islands were gazetted as a Marine Park (MP) in 1994 (Department of Marine Park Malaysia 2014). At  
59 the MP, regulations are designed to protect essential marine ecosystems so as to ensure sustainability  
60 of vital fish stocks and marine environments (Department of Marine Parks Malaysia 2016).  
61 Government departments, local businesses, and social enterprises alike engage in reef restorative  
62 activities such as coral planting projects, promotion of 'reef friendly' tourism techniques, removal of  
63 toxic or smothering materials, and educational outreach. Despite these efforts, large-scale effectiveness  
64 is significantly impacted by restraints in staff capacity, lack of adequate financial resources, and  
65 logistical limitations (Islam *et al.* 2013). At the Perhentian Islands, littering, overfishing, and discarded  
66 fishing gear are degrading the reef states and monitoring studies continue to present trends of declining  
67 coral health (Reef Check Malaysia 2008-2018). As sea anemones require environmental parameters  
68 similar to that of corals, the changing environment may influence the hosting sea anemones'  
69 opportunity for colonisation and growth (Tkachencko *et al.* 2007). In environments additionally

70 marked by high sedimentation, and water temperatures outside the thermal ranges suited to algae  
71 proliferation, sea anemones increase growth rates, asexual reproductive rates, and increase aggressive  
72 attacks on neighbouring corals (Chomsky *et al.* 2004; Liu *et al.* 2009; Liu *et al.* 2015).

73

74 The clear shallow waters that serve as primary habitat to tropical corals and sea anemones are  
75 characteristically low in available nutrient levels (Hopley 2011; Mohamed *et al.* 2019; Schwartz  
76 2005), with dependent species relying on high nutrient recycling adaptations, storage mechanisms, and  
77 a capacity for efficient nutrient capture in the water column (Ortega *et al.* 1988; Savage 2019). At low  
78 nutrient levels, corals, sea anemones, and algae coexist. Upon altering dissolved P and N levels  
79 however, imbalance between these three groups sets in (Liu *et al.* 2009). Initially, high nutrient levels  
80 are catalytic to higher chlorophyll densities, with increases in energy availability and growth rates for  
81 corals (Savage 2019). Further rises however are a determinant for increased algae and sea anemone  
82 abundance.

83

84 Nutrient dispersal along Malaysia's coastal waters is biologically managed through a suit of  
85 mechanisms including mixing, upwelling, currents, tides and drifts, terrestrial run-off and seasonal  
86 climatic patterns including monsoon events. Research on global nutrient flow mechanisms  
87 demonstrate that water movement allows deeper lying nutrients to be transported to shallow regions,  
88 via currents or drainage from terrestrial water systems (McPhee-Shaw *et al.* 2007; Mohamed *et al.*  
89 2019; Powley *et al.* 2017; Sardessai *et al.* 2007). The supply of nutrients to the Perhentian Islands  
90 corresponds with water displacement events occurring during the seasonal cycles of the Northeast  
91 monsoon, and as such, marine species like hosting sea anemones, which rely on these nutrients for  
92 growth, may expand coverage in synchrony with the Northeast monsoon. Rivers draining into the  
93 South China Sea along Terengganu predominantly regulate nutrient supply to the Perhentian Islands,  
94 with highest concentrations found during the post monsoon phase (Adiana *et al.* 2014; Mohamed &  
95 Amil 2015). Along the Perhentian reefs, distributions of dissolved NO<sub>3</sub> and PO<sub>4</sub> are between 16 to 83  
96 times higher during the post monsoon phase, with the greatest depletion levels located at depths of  
97 three meters, and a maximum concentration between three- and six-meters depth (Mohamed *et al.*  
98 2019). Besides delivering required nutrients, discharge of pollutants into river systems can also occur  
99 and results in elevated values of trace metals in neighbouring coastal regions (Shazili *et al.* 2006).

100

101 Experiments also reveal high survival rates when sea anemone specimens are split into sections,  
102 demonstrating their capacity to propagate through axial thinning and tearing of tissue via longitudinal  
103 fission (Porat & Chadwick-Furman 2004; Scott *et al.* 2014). Their ability to reproduce via such  
104 mechanisms displays adaptivity to challenging environments and highlights mechanisms of  
105 competitive re-colonisation. In the case of clustered sea anemones, asexual reproductive techniques,

106 including longitudinal fissure, are proposed to underly aggregate formations as physically touching sea  
107 anemones are reported to constitute clones (Allen 1975; Dunn 1977).

108  
109 Sea anemones with hosting capacity additionally undertake an obligatory symbiosis with anemonefish  
110 (*Amphiprion spp.*) for nutrient intake, including a direct transfer from symbiont to host (Cleveland *et*  
111 *al.* 2011; Norin *et al.* 2018; Porat & ChadwickFurman 2004; Roopin & Chadwick 2009). As such,  
112 actively hosting sea anemones show increased growth rates and regeneration rates compared to their  
113 non-hosting counterparts (Holbrook & Schmitt 2005). Moreover, actively hosting sea anemones  
114 experience increased oxygenation, resulting in higher respiratory and growth rates compared to sea  
115 anemones without symbiotic anemonefish residents (Herbert *et al.* 2017; Szczezbak *et al.* 2013) and  
116 the distribution patterns of hosting sea anemones are tightly linked to successful recruitment of  
117 symbiotic anemonefish (Elliot & Mariscal 2001). Furthermore, their hosting capacity allows sea  
118 anemones increased odds for successful recovery following bleaching events (Norin *et al.* 2018). With  
119 increases in sea temperature and subsequent rises in bleaching risk, hosting sea anemones maintain a  
120 higher likelihood of adaptation and survival under adverse conditions (Pryor *et al.* 2020).

121  
122 Within the Malaysian waters, large formations of sea anemone aggregates or clustered formations can  
123 be found naturally (Dunn 1977), including sea anemone species with hosting capacity. In Terengganu,  
124 on Perhentian Kecil, a reef site adjacent to the town village, called ‘Village Reef’ displays large  
125 aggregates of hosting sea anemones. Proximity of the reef site to the village indicates a possibility of  
126 anthropogenic effects, which have been found to decrease hard coral cover in addition to affecting  
127 coral community composition (Crehan *et al.* 2019). If the reefs of Perhentian Kecil experience  
128 environmental settings conducive to hosting sea anemone proliferation, we expect the local sea  
129 anemone aggregates to expand whilst favourable conditions remain in play.

130  
131 As previously mentioned, at Village Reef, large assemblages of sea anemone species *Heteractis*  
132 *magnifica* are present (**Figure 1**). To date, no research has been conducted to investigate *Heteractis*  
133 *magnifica* population dynamics in this specific region via quantitative study. As such, the current  
134 study sought to monitor the assemblages of *Heteractis magnifica* at Village Reef so as to develop a  
135 baseline measurement of their abundance levels, formation patterns, and hosting status, in addition to  
136 examining *Heteractis magnifica* growth.

137  
138 The current study expects to find time related effects on sea anemone size and cluster formations  
139 where formation cover, individual size, and clustered counts increase over time, by reasoning that  
140 synchrony with post Northeast monsoon nutrient availability will stimulate growth at the reef site. In  
141 addition, a significant difference between reef habitats is expected, with the patch reef deemed more

142 favourable for *Heteractis magnifica* proliferation based on depth parameters. In the patch region at  
143 Village Reef, we expect higher *Heteractis magnifica* abundance levels and increased formation size,  
144 individual size, and cluster counts over time, compared to the fringe reef. More so, as active hosting  
145 status is correlated to increased growth and reproduction rates (Holbrook & Schmitt 2005; Porat &  
146 Chadwick-Furman 2004), we also expect the actively hosting sea anemones at Village Reef to be  
147 significantly larger than their non-hosting counterparts, including larger individual sizes over time.  
148 Finally, with previous studies highlighting an important role for asexual reproduction under favourable  
149 conditions, (Scott *et al.* 2014; Brace & Quicke 1986) the current study expects increased clustered  
150 formations over time.

151  
152 This study offers a first examination of localised *Heteractis magnifica* formations. Insights serve to  
153 increase local distribution knowledge and informs reef management and conservation. In addition,  
154 resultant knowledge may aid coral planting strategies at the Perhentian Islands by expanding the  
155 ability with which to identify temporal environmental patterns that favour expansion of hosting sea  
156 anemones over that of local corals.

157

158 **Figure 1.** Images of *Heteractis magnifica* formations at research site Village Reef, including a  
159 schematic of study site area (bottom right).  
160

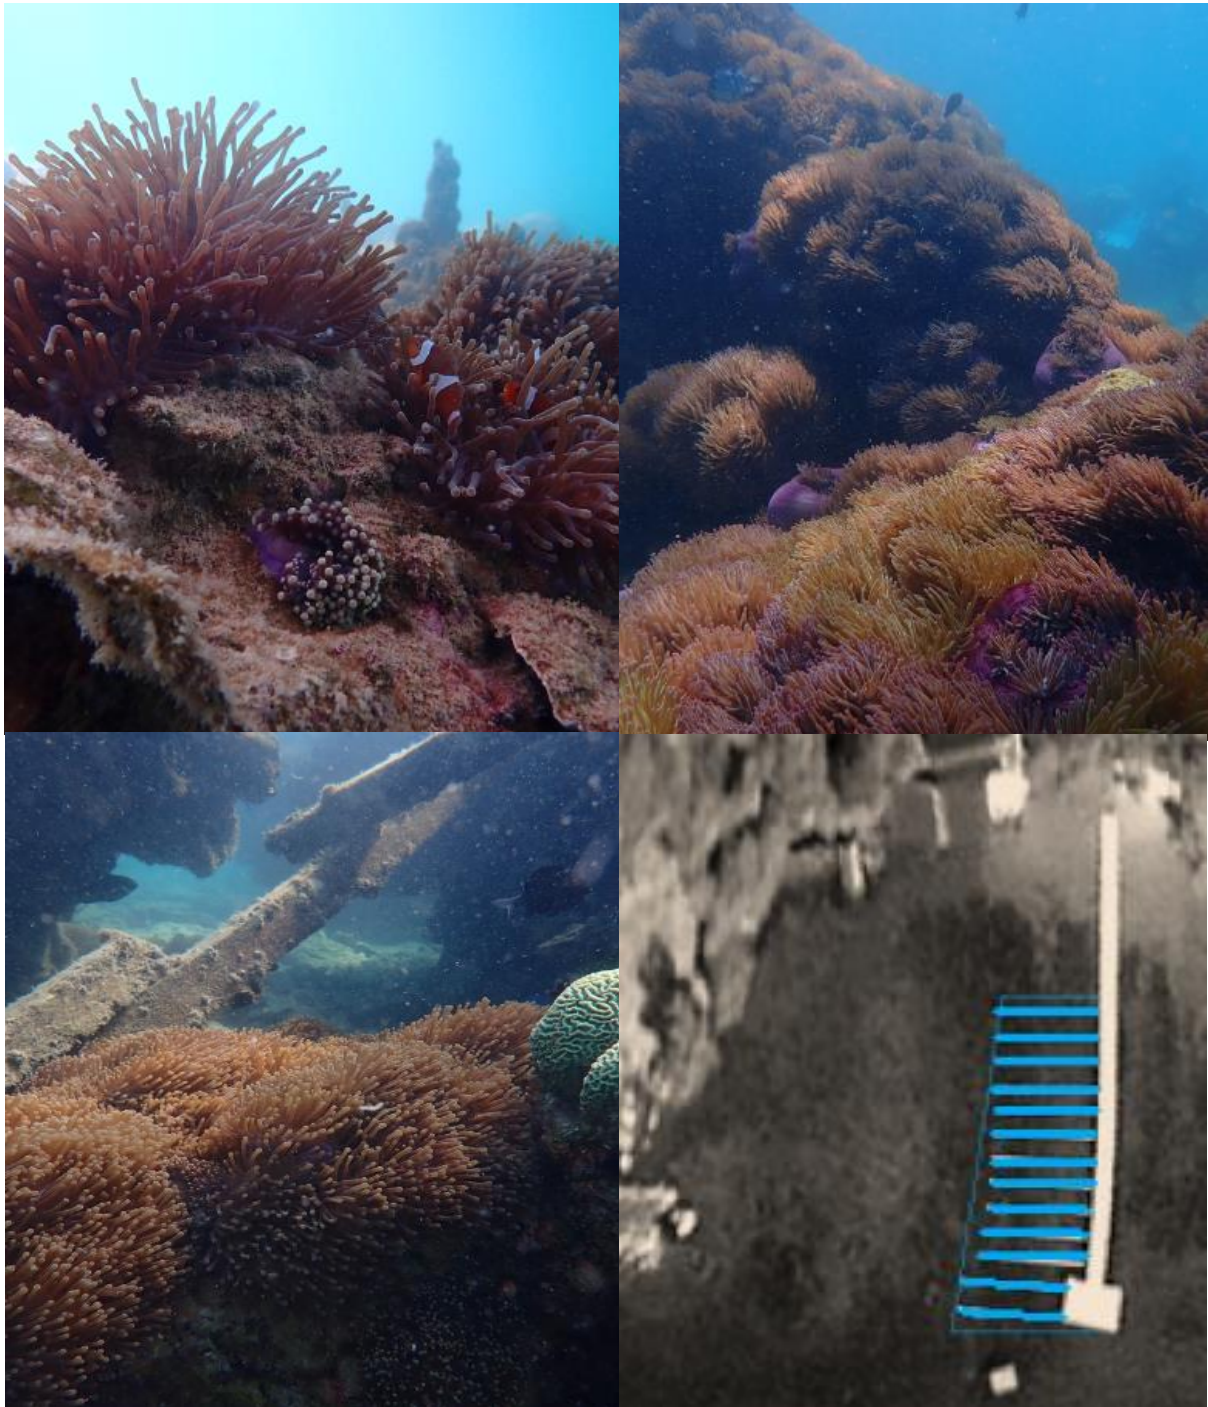

161  
162

163 **MATERIALS AND METHODS**

164 *Study Area and Study Population*

165 Data was collected at the Village Reef survey site on the South East of Perhentian  
166 Kecil (central coordinates: 5°53'39.05"N, 102°43'37.61"E). Village Reef comprises of a fringing,  
167 coral dominant reef section located in the lower intertidal zone, and a deeper region of patch reef.  
168 Throughout the shallower fringing reef, the effects of the semi-diurnal tides can create partial exposure  
169 during low tides, making parts of this habitat unsuited to *Heteractis magnifica* (Fautin 1991; Muller-  
170 Parker & Davy 2001). The patch reef displays dead coral bommie structures which have since been  
171 recolonized by stony and soft corals, sponges, algae species, and sea anemones.

172

173 Within the site boundaries, two hosting sea anemone species were identified: *Stichodactyla gigantea*  
174 and *Heteractis magnifica*. Only two counts of *Stichodactyla gigantea* were present during August  
175 2020, compared to 224 formations of the  
176 *Heteractis magnifica* at that time. Interspecies differences in reproductive strategies  
177 (Aubert 2014), habitat parameters (Elliot & Mariscal 2001), and size (Fautin & Allen 1992),  
178 determined for the exclusion of the *Stichodactyla gigantea* specimens to control for confounding  
179 effects.

180

181 *Data Collection Method*

182 Between May and August of 2020, abundance, size, hosting status, and formation markers of hosting  
183 sea anemone species *Heteractis magnifica* were monitored using SCUBA. All data collection sessions  
184 took place between 8.30am and 11.59am, and visibility had to be over five meters as a prerequisite to  
185 diving. Within the survey area, ten 20 meter transects were laid out in parallel using a 225° south-west  
186 bearing, in addition to cross-referencing from a stable landmark (see **Figure 1**). Distance between  
187 parallel transects was set at 4 meters to allow accurate monitoring without overlap. Following transect  
188 placement, two research divers regressed along the transect line, keeping a two-meter width  
189 perpendicular to the transect. Each *Heteractis magnifica* formation within the survey area was  
190 identified, measured, and observed to record the variables under study: reef habitat, hosting status,  
191 formation size and cluster counts.

192

193 *Reef Habitat*

194 Reef habitat was categorised as 'patch' or 'fringe' per 80m<sup>2</sup> transect, based on in-situ depth and  
195 reefscape observations. Fringing reef areas were marked by shallower depth <1.5m, absence of coral  
196 bommies, and significantly higher levels of live coral cover, where interconnected carpets of hard  
197 corals dominated the sea floor. Of the total survey site, 480m<sup>2</sup> was defined as fringing reef, which  
198 comprised of five transects measuring the shallowest regions of the research site. At Village Reef's

199 fringing reef, 20 *Heteractis magnifica* formations were recorded during August 2020, with a  
200 cumulative cover of ~2.4m<sup>2</sup>.

201  
202 The shallowest three fringing reef transects contained three solitary *Heteractis magnifica* formations  
203 within 240m<sup>2</sup>, representing 0.45% of the total abundance during  
204 August. As this area skewed the data distribution significantly, and literature indicated unfavourable  
205 habitat requirements, these transects were excluded as outliers from the final analysis. The remaining  
206 transects covered a survey area of 560m<sup>2</sup>, of which 240m<sup>2</sup> contained fringe reef.

207  
208 Patch reef was marked by depth >1.5m, with a maximum, tide-dependent depth between 5-6 meters.  
209 The patch reef housed coral bommie skeletal structures, interspersed with sandy areas, rocky  
210 substrates, and coral rubble. Four transects were located within the patch reef of the survey site at  
211 Village Reef, with a combined area of 320m<sup>2</sup>. In August, 224 *Heteractis magnifica* formations were  
212 recorded on the patch reef, with a cumulative cover of ~34.5m<sup>2</sup>.

213  
214 *Hosting Status*

215 Actively hosting or non-hosting status was recorded, as previous results indicate effects of size and  
216 growth (Herbert *et al.* 2017; Elliot & Mariscal 2001). *Heteractis magnifica* specimens were coded as  
217 actively hosting if they were inhabited by symbiotic anemonefish. The temporal nature of symbiosis  
218 between hosting sea anemones and other fish species such as the *Dascyllus trimaculatus* (Fautin &  
219 Allen

220 1992), made that only anemonefish species were included in hosting assessments.

221  
222 Upon encountering a *Heteractis magnifica* specimen, indicators of hosting status were observed,  
223 including clear presence of anemonefish, or indirect indicators such as irregular movements between  
224 tentacles plus partial observations of anemonefish. If during in-situ observations a given sea anemone  
225 appeared not to be actively hosting, they were inspected more closely to check for juvenile species. If  
226 active hosting was suspected but not confirmed, video footage was recorded and reviewed to inform  
227 hosting status ex-situ.

228  
229 *Heteractis Magnifica Formations*

230 Formations were examined three times between May and August 2020. Sea anemones dwelling in  
231 clustered formations are found to have higher growth rates, higher reproductive success, and can  
232 harbour more symbiotic anemonefish species, which in turn promotes increased nutrient deposition,  
233 and higher levels of host oxygenation (Cleveland *et al.* 2011; Herbert *et al.* 2017; Holbrook & Schmitt  
234 2005; Norin *et al.* 2018; Porat & Chadwick-Furman 2004). Specimens were marked as clustered



235 formations when a fully expanded individual's tentacles could touch a neighbouring sea anemone  
236 (Allen 1975). In the event of ambiguity, video recordings were made for ex-situ examination by both  
237 researchers.

238

#### 239 *Sea Anemone Size and Clustered Individual Counts*

240 To estimate size, a long and short axis measurement of the oral disc was taken, using a tailor's tape,  
241 and subsequently used to conduct calculations (Hirose 1985). If the *Heteractis magnifica* was  
242 retracted, time was given for the animal to resume expansion before resuming measuring. For sea  
243 anemones present as clustered formations, the same method was applied, but using the centre of the  
244 cluster as a mid-point for axial measurements. In the event that clusters did not fully cover the  
245 substrate, or if clusters did not assume a circular or elliptical shape, an area cover estimate was  
246 recorded to adjust calculation (0-100%, estimated in increments of 10).

247

248 To calculate individual size estimates for clustered sea anemones, cluster categories were marked  
249 (Allen 1975). Categories include solitary, less than 5, less than 10, less than 15, with subsequent  
250 increments of 5 until less than 35, which was the largest cluster formation category encountered at  
251 Village Reef. The midpoint of each category was subsequently used to estimate a median number of  
252 individuals per cluster, with the minimum and maximum count per category used to determine ranges  
253 of individuals within a cluster.

254

255 To calculate individual size, the total cluster size was divided by the median number of individuals,  
256 based on methods used by other researchers (Holbrook & Schmitt  
257 2005). For example, in a cluster of <15 individuals with a collective size estimate of 0.150m<sup>2</sup>, the  
258 mean individual size was calculated by taking the mid-point of the cluster category, in this case 12  
259 (cluster category <15 indicates 10-14 individuals) making the individual size estimate 0.0130m<sup>2</sup> for  
260 all individuals.

261

#### 262 *Statistical Analysis*

263 Data descriptive statistics and statistical analyses were run using Statistical Package for Social  
264 Sciences (SPSS) version 27.0. Time logs, depth readings, date stamps, and database inputs were all  
265 completed immediately following dives, and an interobserver analysis revealed a recording accuracy  
266 of 96,7% on all monitored variables.

267

268 For all significance tests, a threshold of .05 or was used to determine rejection or acceptance of the  
269 null hypothesis. Exploration of the dataset in SPSS showed nonnormal data distribution, thus requiring  
270 non-parametric testing of our hypotheses. In addition, as fringe reef and patch reef demonstrated

271 substantial habitat differences, the analyses pertaining to hosting status and clustered formations were  
272 run exclusively for the patch reef.

273

## 274 RESULTS

275 In total, 560m<sup>2</sup> of the reefscape at Village Reef was monitored and analysed, and 640 *Heteractis*  
276 *magnifica* formations were recorded. In the fringe reef area 65 formations were analysed, with 575  
277 formations analysed within the patch reef. Of the sea anemones, 77.03% were actively hosting  
278 symbiotic *Amphiprion spp.* (N=493). Of these, 65.8% had resident *Amphiprion ocellaris* (N=421),  
279 10.9% were hosting *Amphiprion perideraion* (N=70), and two formations were hosting both  
280 anemonefish species. On average, over the entire monitoring period, 48.91% of the analysed  
281 specimens regarded solitary formations of *Heteractis magnifica*, with the remainder concerning  
282 clustered formations.

283

284 Throughout the research site, an average of 3.79 individual sea anemones were clustered together  
285 (SD=4.75), with a maximum of 32 individuals clustered within a formation. During May, the  
286 collective cover of the *Heteractis magnifica* population was 31.84m<sup>2</sup>, reaching 37.63m<sup>2</sup> by July, and  
287 reducing to 36.88m<sup>2</sup> by August. Further descriptive statistics for the study area at Village Reef are  
288 presented in **Table 1**.

289

290 In the fringe reef, 73.8% of the formations contained actively hosting *Heteractis magnifica* formations  
291 (N=65). In addition, 54.48% of the sea anemones presented as solitary formations, with clustered  
292 formations containing 2.51 individuals on average.

293 The maximum clustered formation within this reef region consisted of 12 individuals.

294 During May, the collective cover of the sea anemones located in the fringing region at

295 Village Reef was 1.80m<sup>2</sup>, which increased to 3.64m<sup>2</sup> by July, and came to 2.39m<sup>2</sup> by August. **Table 2**  
296 displays further descriptive statistics for Village Reef's fringe reef.

297

298 At Village Reef's patch reef, just under half of the 575 formations contained solitary formations, at  
299 48.35%. Of the clustered formations, the average count per cluster was 3.93 specimens, with a  
300 maximum of 32 individuals within one formation. 77.39% of sea anemones were actively hosting  
301 anemonefish. The cumulative *Heteractis magnifica* sea anemone coverage on the patch reef was  
302 30.05m<sup>2</sup> in May, 33.99m<sup>2</sup> in July, and 34.49m<sup>2</sup> by August. Other descriptive statistics for this reef  
303 region are presented in **Table 3**.

304

305 To test for significant effects of time on *Heteractis magnifica* abundance levels at Village Reef,  
306 Kruskal-Wallis analyses were run for formation size differences, individual sea anemone size

307 differences, and cluster make-up differences over time. Results indicate no significant effect of time on  
308 sea anemone growth, including formation size, individual size and the counts of individuals clustered  
309 within a formation ( $p = .095$ ,  $p = .290$ , and  $p = .309$  respectively).

310

311 Moreover, to test for differences in formation size, individual size, and cluster makeup between the  
312 two reef habitats at Village Reef, Mann-Whitney U tests were performed. Results indicate that  
313 throughout the entire period of monitoring, a significant difference exists in the number of clustered  
314 individuals present within a formation between fringe and patch reef regions, where clustered  
315 formations contained significantly more individual specimens in the patch reef (see **Table 4**). No  
316 significant results were found for formation or individual sea anemone size throughout the monitoring  
317 period. Results did reveal a significant difference in cluster counts for May between the patch and  
318 fringe reef, with a mean count of 1.80 specimens per formation at the fringe reef, and a mean count of  
319 3.71 in the patch reef (see **Table 4**). Formation cover was significantly different between reef habitats  
320 in July (see **Table 4**), with an average formation cover of  $.151\text{m}^2$  in the fringe reef, and  $.174\text{m}^2$  in the  
321 patch reef. The results provide partial support for our hypothesis of significant differences in  
322 *Heteractis magnifica* cover, size, and cluster make-up over time, as formation cover, and cluster counts  
323 did differ significantly between reef habitats within specific monitoring periods, although individual  
324 size estimates did not.

325

326 Mann-Whitney U tests were performed to examine effects of hosting status on sea anemone formation  
327 cover, individual size, and cluster counts within the patch reef. Throughout the entire monitoring  
328 period, those *Heteractis magnifica* formations actively hosting anemonefish were larger than their  
329 non-hosting counterparts in formation cover, individual size, and cluster counts:  $U = 37181.500$ ,  $p <$   
330  $.001$  for formation cover;  $U = 31776.500$ ,  $p = .044$  for individual size; and  $U = 36596.500$ ,  $p <$   $.001$  for  
331 cluster counts. When testing these effects for the individual monitoring periods, results remained  
332 significant for May:  $U = 5061.000$ ,  $p <$   $.001$  for formation cover;  $U = 4208.000$ ,  $p <$   $.001$  for  
333 individual size; and  $U = 4627.500$ ,  $p <$   $.001$  for cluster counts. In July, only cluster counts had  
334 significant differences in hosting status:  $U = 3558.000$ ,  $p = .040$ .

335

336 For August, no significant differences related to hosting status were detected. **Table 5** displays  
337 descriptive statistics for actively hosting and non-hosting *Heteractis magnifica*. As displayed in this  
338 table, sea anemones were larger when hosting, with a mean formation size difference of  $.159\text{m}^2$ .  
339 Individual sizes were larger for actively hosting by  $.015\text{m}^2$  compared to non-hosting sea anemones.  
340 Moreover, cluster counts were larger for actively hosting formations, with 4.52 specimens on average  
341 in actively hosting formations, and 1.39 in non-hosting formations. These results are in keeping with

342 the hypothesis of the study, although not all the expected effects regarding time and size estimates  
343 were found in the current study.

344

345 Finally, to test for time effects on clustered versus solitary sea anemones, a ChiSquare test was run.

346 Results revealed no significant effects of formation make-up over time, indicating that abundance

347 levels of solitary or clustered formations did not differ significantly between the monitoring periods ( $p$

348 = .130), a result that contrasts our study hypothesis.

349

350 **Table 1.** *Descriptive statistics for Heteractis magnifica monitored within the entire research site at Village Reef, including formation and individual size,*  
 351 *individual counts, and hosting status.*

| Monitoring period | N   | Formation size (m <sup>2</sup> ) |      | Individuals per cluster (count) |      | Individual size (m <sup>2</sup> ) |      | Actively hosting (%) | Solitary formations (%) | Minimum number of individuals (count) | Maximum number of individuals (count) |
|-------------------|-----|----------------------------------|------|---------------------------------|------|-----------------------------------|------|----------------------|-------------------------|---------------------------------------|---------------------------------------|
|                   |     | Mean                             | SD   | Mean                            | SD   | Mean                              | SD   |                      |                         |                                       |                                       |
| May               | 197 | .162                             | .211 | 3.51                            | 4.56 | .049                              | .031 | 74.11                | 47.72                   | 548                                   | 836                                   |
| July              | 219 | .172                             | .242 | 4.11                            | 5.00 | .044                              | .026 | 79.45                | 47.95                   | 729                                   | 1073                                  |
| Aug               | 224 | .164                             | .249 | 3.73                            | 4.90 | .047                              | .036 | 77.23                | 50.89                   | 676                                   | 992                                   |
| Total             | 640 | .166                             | .235 | 3.79                            | 4.75 | .046                              | .031 | 77.03                | 48.91                   | 1953                                  | 2901                                  |

352

353

354 **Table 2.** *Descriptive statistics for Heteractis magnifica monitored within the fringing reef region of the research site at Village Reef, Perhentian Kecil,*  
 355 *including formation and individual size, individual counts, and hosting status.*

| Monitoring period | N  | Formation size (m <sup>2</sup> ) |      | Individuals per cluster (count) |      | Individual size (m <sup>2</sup> ) |      | Actively hosting (%) | Solitary formations (%) |
|-------------------|----|----------------------------------|------|---------------------------------|------|-----------------------------------|------|----------------------|-------------------------|
|                   |    | Mean                             | SD   | Mean                            | SD   | Mean                              | SD   |                      |                         |
| May               | 20 | .090                             | .078 | .056                            | .042 | 1.80                              | 1.51 | 75.00                | 70.00                   |
| July              | 24 | .151                             | .152 | .060                            | .042 | 2.96                              | 2.74 | 75.00                | 45.83                   |
| Aug               | 21 | .114                             | .113 | .047                            | .034 | 2.67                              | 2.60 | 71.43                | 47.62                   |
| Total             | 65 | .118                             | .114 | .054                            | .039 | 2.48                              | 2.28 | 73.81                | 54.48                   |

356

357 **Table 3.** *Descriptive statistics for Heteractis magnifica monitored within the patch reef region of the research site at Village Reef, including formation and*  
 358 *individual size, individual counts, and hosting status.*

| Monitoring period | N   | Formation size (m <sup>2</sup> ) |      | Individuals per cluster (count) |      | Individual size (m <sup>2</sup> ) |      | Actively hosting | Solitary formations |
|-------------------|-----|----------------------------------|------|---------------------------------|------|-----------------------------------|------|------------------|---------------------|
|                   |     | Mean                             | SD   | Mean                            | SD   | Mean                              | SD   | (%)              | (%)                 |
| May               | 177 | .170                             | .220 | 3.71                            | 4.43 | .048                              | .029 | 74.01            | 45.20               |
| July              | 195 | .174                             | .251 | 4.25                            | 5.19 | .041                              | .023 | 80.00            | 48.21               |
| Aug               | 203 | .170                             | .258 | 3.84                            | 5.07 | .047                              | .037 | 77.83            | 51.23               |
| Total             | 575 | .171                             | .243 | 3.93                            | 4.90 | .045                              | .030 | 77.39            | 48.35               |

359

360 **Table 4.** Mann-Whitney *U* results for differences in *Heteractis magnifica* formation cover, size, and  
 361 cluster make-up between the fringe and patch reef regions at Village Reef.

| Monitoring period                 | N   | Test statistic | Stand. test<br>statistic | p-value | S.E.     |
|-----------------------------------|-----|----------------|--------------------------|---------|----------|
| <i>Entire monitoring period</i>   | 640 |                |                          |         |          |
| Formation cover (m <sup>2</sup> ) |     | 19511.500      | 0.583                    | .074    | 1412.950 |
| Individual size (m <sup>2</sup> ) |     | 16637.500      | -1.451                   | .280    | 1412.950 |
| Cluster counts                    |     | 20873.000      | 1.670                    | .048*   | 1309.020 |
| <i>May</i>                        | 197 |                |                          |         |          |
| Formation cover (m <sup>2</sup> ) |     | 2145.500       | 1.556                    | .356    | 241.680  |
| Individual size (m <sup>2</sup> ) |     | 1680.500       | -0.370                   | .060    | 241.680  |
| Cluster counts                    |     | 2287.000       | 2.310                    | .011*   | 223.770  |
| <i>July</i>                       | 219 |                |                          |         |          |
| Formation cover (m <sup>2</sup> ) |     | 2179.000       | -0.550                   | .048*   | 292.910  |
| Individual size (m <sup>2</sup> ) |     | 1852.000       | -1.666                   | .292    | 292.910  |
| Cluster counts                    |     | 2464.500       | 0.456                    | .325    | 273.170  |
| <i>August</i>                     | 224 |                |                          |         |          |
| Formation cover (m <sup>2</sup> ) |     | 2185.500       | 0.177                    | .430    | 282.718  |
| Individual size (m <sup>2</sup> ) |     | 2045.500       | -0.304                   | .381    | 282.719  |
| Cluster counts                    |     | 2211.000       | 0.306                    | .380    | 259.920  |

362 **Table 5.** Descriptives for active- and non-hosting formations of *Heteractis magnifica* at the patch reef  
 363 region at Village Reef.  
 364

| Monitoring period                 | Active Hosting |      |      | Non-Hosting |      |      |
|-----------------------------------|----------------|------|------|-------------|------|------|
|                                   | N              | MEAN | SD   | N           | MEAN | SD   |
| <i>Entire period</i>              | 445            |      |      | 130         |      |      |
| Formation cover (m <sup>2</sup> ) |                | .191 | .262 |             | .105 | .150 |
| Individual size (m <sup>2</sup> ) |                | .046 | .031 |             | .042 | .029 |
| Cluster counts                    |                | 4.32 | 5.17 |             | 2.63 | 3.70 |
| <i>May</i>                        | 131            |      |      | 46          |      |      |
| Formation cover (m <sup>2</sup> ) |                | .211 | .241 |             | .052 | .047 |
| Individual size (m <sup>2</sup> ) |                | .052 | .029 |             | .037 | .028 |
| Cluster counts                    |                | 4.52 | 4.87 |             | 1.39 | .80  |
| <i>July</i>                       | 156            |      |      | 39          |      |      |
| Formation cover (m <sup>2</sup> ) |                | .185 | .268 |             | .133 | .161 |
| Individual size (m <sup>2</sup> ) |                | .040 | .023 |             | .046 | .022 |
| Cluster counts                    |                | 4.54 | 5.45 |             | 3.08 | 3.85 |
| <i>August</i>                     | 158            |      |      | 45          |      |      |
| Formation cover (m <sup>2</sup> ) |                | .180 | .274 |             | .135 | .193 |

|                                   |      |      |      |      |
|-----------------------------------|------|------|------|------|
| Individual size (m <sup>2</sup> ) | .047 | .037 | .044 | .036 |
| Cluster counts                    | 3.94 | 5.13 | 3.51 | 4.91 |

---

365

## 366 **DISCUSSION**

367 The current study provided the first quantitative assessment of assemblages of *Heteractis magnifica*  
368 sea anemones located at Village Reef, Perhentian Kecil. As corals and sea anemones have been found  
369 to directly compete for suitable substrate and nutrients (Liu *et al.* 2009), understanding when and  
370 where sea anemones may outcompete corals when reef disturbances have occurred will help inform  
371 reef management and conservation programs around the Perhentian Islands. This study revealed  
372 several significant results, which provide preliminary insight into the population dynamics of the local  
373 distributions of *Heteractis magnifica*.

374

375 The study yielded several significant effects of time on sea anemone formation cover, individual size,  
376 and cluster counts for the entire assemblage of *Heteractis magnifica* at Village Reef, with differential  
377 results depending on reef habitat and monitoring period. Within the deeper patch reef, larger cluster  
378 counts were found during May, and larger formation cover was seen during July. These findings are in  
379 support of literature on habitat requirements for sea anemones growth indicating seasonal and depth  
380 effects on sea anemone growth and asexual reproduction (Brolund *et al.* 2004; Elliot & Mariscal 2001;  
381 Holbrook & Schmitt 2005). Deeper regions and specific monitoring periods are associated with larger  
382 clusters containing more individuals at Village Reef.

383

384 A relationship of hosting status was present among the sea anemones at Village Reef. Actively hosting  
385 *Heteractis magnifica* were generally larger, contained more individuals within a cluster, and displayed  
386 increased formation cover compared to non-hosting sea anemones. This finding corroborates research  
387 proposing increased growth and asexual reproductive rates for actively hosting sea anemones and  
388 highlights the benefit of hosting (Brolund *et al.* 2004; Cleveland *et al.* 2011; Holbrook & Schmitt  
389 2005; Porat & Chadwick-Furman 2004). However, significance of hosting and non-hosting formations  
390 changed throughout the monitoring period, with no significant differences found towards the pre  
391 monsoon period of August. This result highlights potential influences from seasonal changes including  
392 nutrient and temperature fluctuations and is supported by previous research indicating differential  
393 effects of cover, growth, and asexual reproduction related to seasonal effects (Holbrook & Schmitt  
394 2005). Future research should focus on further detailing hostsymbiont dynamics to establish direct  
395 effects of hosting status on sea anemone growth.

396

397 In addition, with literature proposing a prominent effect of nutrient dynamics following the Northeast  
398 monsoon cycle, this topic deserves future attention. At the Perhentian Islands, nutrients levels reach  
399 peak concentrations in depth range 3-6 meters during the post monsoon phase in April (Mohamed *et*



400 *al.* 2019). As such, expanding the monitoring period will enhance understanding of time related effects  
401 that remained outside the scope of the current study design. With both significant and insignificant  
402 effects, this study provides evidence of a dynamic change, including growth as the season approaches  
403 pre monsoon phase, and shrinkage in *Heteractis magnifica* size and cluster make-up between July and  
404 August. Future research should examine nutrient and temperature fluctuations at Village Reef, to  
405 establish how these are implicated in sea anemone growth. Such future directions are in line with  
406 studies on hosting sea anemones at other locations (Chomsky *et al.* 2004; Liu *et al.* 2009).

407  
408 Despite our best efforts, there are some limitations to this study. Due to the limited monitoring period,  
409 assessment of time effects on the *Heteractis magnifica* population at Village Reef have limited  
410 applicability and would be strengthened by expanding the monitoring period. Ensuring the inclusion of  
411 more pre and post monsoon measurement will help to improve collective understanding of the impact  
412 of time relative to the monsoon on this specific assemblage of sea anemones. More so, indicators of  
413 nutrient level and temperature were not included in the current study due to a lack of reliable  
414 measuring instruments on location. As such, subsequent research would be enriched by additionally  
415 assessing these variables. More so, since solid evidence exists which highlights the influence of these  
416 variables on sea anemone distribution and growth (Adiana *et al.* 2014; Chomsky *et al.* 2004;  
417 Mohamed *et al.* 2019; Muller-Parker & Davy 2001), this aspect would be especially relevant as a  
418 future research direction.

419  
420 Within this quantitative study of *Heteractis magnifica* abundance and assemblage dynamics at Village  
421 Reef, Perhentian Kecil, a first step has been made in better understanding *Heteractis magnifica* growth  
422 patterns locally. The current study adds insight to dynamics of aggregated sea anemones distributions  
423 and can play a valuable role in informing reef management and reef conservation programs.  
424 Restabilising the reefs on the Perhentian Islands is a critical task to ensure sustained viability of these  
425 reefs.

## 426 427 **CONCLUSION**

428 In conclusion, the present study provided a first quantitative analyses of the local population of  
429 *Heteractis magnifica* sea anemones, including inspection of their aggregate forms, individual size,  
430 clustered counts, and hosting status at Village Reef, Perhentian Kecil, Malaysia throughout May, July,  
431 and August. Non -parametric testing revealed significant differences in cluster size per reef habitat  
432 region, and demonstrated the presence of larger sea anemone coverage, individual size estimates and  
433 cluster counts in actively hosting *Heteractis magnifica*. This study therefore contributes a first  
434 examination of the population of sea anemones present at Village Reef and helps to inform local reef

435 management and conservation programs by providing valuable insight on *Heteractis magnifica*  
436 population dynamics.

437 **REFERENCES**

- 438 Adiana G, Shazili NAM, Marinah MA and Bidai J. (2014). Effects of northeast monsoon on trace  
439 metal distribution in the South China Sea off Peninsular Malaysia. *Environ. Monit. Assess.* 186:421-  
440 431.  
441 doi: 10.1007/s10661-013-3387-9  
442  
443 Allen GR. (1975). Anemonefishes and their amazing partnership. *J. Nat. Hist.* 18(8):274-277.  
444 Retrieved via: <https://museum-publications.australian.museum/aus-nat-hist-1975-v18-iss8/>  
445  
446 Aubert RG. (2014). Fine-scale population structure of two anemones (*Stichodactyla gigantea* and  
447 *Heteractis magnifica*) in Kimbe Bay, Papua New Gineau. [Thesis]. King Abdulla University, Thuwal,  
448 Saudi Arabia: 58 pages.  
449  
450 Brace RC and Quicke DLJ. (1986). Dynamics of Colonization by the Beadlet  
451 Anemone, *Actinia Equina*. *J. Mar. Biol. Ass. U.K.* 66(01): 21.  
452 doi: 10.1017/S002531540003962X  
453  
454 Brolund TM, Tychsen A, Nielsen LE and Arvedlund M. (2004). An assemblage of the host anemone  
455 *Heteractis magnifica* in the northern Red Sea, and distribution of the resident anemonefish. *J. Mar.*  
456 *Biol. Ass. U.K.* 84:671-674.  
457 doi: 10.1017/S0025315404009737h  
458  
459 Chomsky O, Kamenir Y, Hyams M, Dubinsky Z and Chadwick-Furman NE. (2004). Effects of  
460 temperature on growth rate and body size in the Mediterranean sea anemone *actinia equina*. *J. Exp.*  
461 *Mar. Bio. Ecol.* 313(1), 63-73.  
462 doi: 10.1016/j.jembe.2004.07.017  
463  
464 Cleveland A, Verde EA and Lee RW. (2011). Nutritional exchange in a tropical tripartite symbiosis:  
465 Direct evidence for the transfer of nutrients from anemonefish to host anemone and zooxanthellae.  
466 *Mar. Biol.* 158(3): 589-602.  
467 doi: 10.1007/s00227-010-1583-5  
468  
469 Crehan O, Mair J, Hii Yii S, Safuan CDM and Bachok Z. (2019). Effect of tourism and sedimentation  
470 on coral cover and community structure. *Trop. Life Sci. Res.* 30(2): 149–165.  
471 doi: 10.21315/tlsr2019.30.2.11  
472

- 473 Department of Marine Park Malaysia (2014, September). Marine Park Management in Malaysia.  
474 Presented at the 7th Cooperation Forum under the Cooperative Mechanism on the Safety of  
475 Navigation and Environmental Protection in the Straits of Malacca Environmental Protection in the  
476 Straits of Malacca and Singapore.  
477 Retrieved via [http://www.cm-soms.com/uploads/2/7/CF7-8-  
478 3%20Management%20of%20Marine%20Protected,%20UMT.pdf](http://www.cm-soms.com/uploads/2/7/CF7-8-3%20Management%20of%20Marine%20Protected,%20UMT.pdf)  
479  
480 Department of Marine Park (2016). Tourist arrivals and receipts to Malaysia -facts & figures.  
481 Retrieved via [http://www.dmpm.nre.gov.my/data\\_pelawat.html?uweb=jtl](http://www.dmpm.nre.gov.my/data_pelawat.html?uweb=jtl)  
482  
483 Dunn DF. (1977). Dynamics of external brooding in sea anemone Eptictic Epiactis prolifera. *Mar.*  
484 *Biol.* 39:41-49.  
485 doi: 10.2307/1540543  
486  
487 Elliott JK and Mariscal RN. (2001). Coexistence of nine anemonefish species: differential host and  
488 habitat utilization, size and recruitment. *Mar. Biol.* 138:23-36.  
489 doi: 10.1007/s002270000441  
490  
491 Fautin DG. (1991). The anemonefish symbiosis: what is known and what is not.  
492 *Symbiosis* 10:23-46.  
493 <http://hdl.handle.net/1808/6134>  
494  
495 Fautin DG and Allen GR (1992). Field Guide to Anemonefishes and Their Host Sea Anemones.  
496 Converted for electronic publication by Humpries J, Sherman D; The MUSE project. Perth: Western  
497 Australian Museum. 65p.  
498 [https://eqzotica.ucoz.ru/\\_ld/0/9\\_ANEMONES.pdf](https://eqzotica.ucoz.ru/_ld/0/9_ANEMONES.pdf)  
499  
500 Herbert NA, Bröhl S, Springer K and Kunzmann A. (2017). Clownfish in hypoxic anemones replenish  
501 host O<sub>2</sub> at only localised scales. *Sci. Rep.* 7(1): 1-10.  
502 doi: 10.1038/s41598-017-06695-x  
503  
504 Hirose Y. (1985). Habitat, distribution and abundance of coral reef sea-anemones (Actiniidae and  
505 Stichodactylidae) in Sesoko Island, Okinawa, with notes on expansion and contraction behavior.  
506 *Galaxea, JCRS* 4:113-127.  
507

- 508 Holbrook SJ and Schmitt RJ. (2005). Growth, reproduction, and survival of a tropical sea anemone  
509 (Actiniaria): benefits of hosting anemonefish. *Coral Reefs* 24:67-73.  
510 doi: 10.1007/s00338-004-0432-8  
511
- 512 Islam G, Noh K, Yew T and Noh A. (2013). Assessing Environmental Damage to Marine Protected  
513 Area: A Case of Perhentian Marine Park in Malaysia. *J. Agric. Sci.* 5(10): doi:..5539/jas.v5n8p132.  
514 doi: 10.5539/jas.v5n8p132  
515
- 516 Hopley D. (ed) (2011). *Encyclopaedia of modern coral reefs*. Dordrecht: Springer. 1234p.  
517
- 518 Kurniawan F, Adrianto L, Bengen DG and Prasetyo LB. (2016). Vulnerability assessment of small  
519 islands to tourism: The case of the Marine Tourism Park of the Gili Matra Islands, Indonesia. *Glob.*  
520 *Ecol.* 6:308-326.  
521 doi: 10.1016/j.gecco.2016.04.001  
522
- 523 Liu P-J, Hsin M-C, Huang Y-H, Fan T-Y, Meng P-J, Lu C-C and Lin H-J. (2015). Nutrient enrichment  
524 coupled with sedimentation favors sea anemones over corals. *PLoS One* 10(4): e0125175.  
525 doi: 10.1371/journal.pone.0125175  
526
- 527 Liu P-J, Lin S-M, Fan T-Y, Meng P-J, Shao K-T and Lin H-J. (2009). Rates of overgrowth by  
528 macroalgae and attack by sea anemones are greater for live coral than dead coral under conditions of  
529 nutrient enrichment. *Limnol. Oceanogr.* 54(4):1167-1175.  
530 doi: 10.4319/LO.2009.54.4.1167  
531
- 532 McPhee-Shaw EE, Siegel DA, Washburn L, Brezesinski MA, Jones JL, Leydecker A and Melack J.  
533 (2007). Mechanisms for Nutrient Delivery to the Inner Shelf: Observations from the Santa Barbara  
534 Channel. *Limnol. Oceanogr.* 52:1748-1766.  
535 doi: 10.4319/lo.2007.52.5.1748  
536
- 537 Mohamed KN and Amil R. (2015). Nutrients Enrichment Experiment on Seawater  
538 Samples at Pulau Perhentian, Terengganu. *Procedia Environ. Sci.* 30:262-267.  
539 doi: 10.1016/j.proenv.2015.10.047  
540
- 541 Mohamed KN, Zainuddin M and Godon E. (2019). Study of Dissolved Nutrient  
542 Condition at Pulau Perhentian, Terengganu. *Pertanika J. Sci. Technol.* 27: 601-617.  
543 Retrieved via <http://psasir.upm.edu.my/id/eprint/68689/1/04%20JST%28S%29-0492-2019.pdf>

- 544
- 545 Muller-Parker G and Davy SK. (2001). Temperate and tropical algal-sea anemone symbioses.
- 546 *Invertebr. Biol.* 120:104-123.
- 547 doi: 10.1111/j.1744-7410.2001.tb00115.x
- 548
- 549 Nasir N, Ibrahim M, Mahamod L and Othman R. (2017). Challenges to implement carrying capacity
- 550 framework: A case study of Pulau Perhentian Marine Park institutional framework. *Plan. Malaysia. J.*
- 551 15: 10.21837/pmjournal.v15.i6.231.
- 552 doi: 10.21837/pm.v15i1.231
- 553
- 554 Norin T, Mills SC, Crespel A, Cortese D, Killen SS and Beldade R. (2018). Anemone bleaching
- 555 increases the metabolic demands of symbiont anemonefish. *Proc. R. Soc. B.* 285: 20180282.
- 556 doi: 10.1098/rspb.2018.0282
- 557
- 558 Ortega M, Pariza J and Navarro E. (1988). Seasonal changes in the biochemical composition and
- 559 oxygen consumption of the sea anemone *Actinia equina* as related to body size and shore level. *Mar.*
- 560 *Biol.* 97: 137-143.
- 561 doi: 10.1007/BF00391253.
- 562
- 563 Porat D and Chadwick-Furman NE. (2004). Effects of anemonefish on giant sea anemones: Expansion
- 564 behavior, growth, and survival. *Hydrobiologia*: 530(1), 513520.
- 565 doi:10.1007/s10750-004-2688-y
- 566
- 567 Powley H, Van Cappellen P and Krom M. (2017). Nutrient Cycling in the Mediterranean Sea: The
- 568 Key to Understanding How the Unique Marine Ecosystem Functions and Responds to Anthropogenic
- 569 Pressures.
- 570 doi: 10.5772/intechopen.70878.
- 571
- 572 Pryor SH, Hill R, Dixson DL, Fraser NJ, Kelaher BP and Scott A. (2020).
- 573 Anemonefish facilitate bleaching recovery in a host sea anemone. *Sci. Rep.* 10:18586.
- 574 doi: 10.1038/s41598-020-75585-6
- 575
- 576 Sardessai S, Ramaiah N, Prasanna Kumar S and de Sousa SN. (2007). Influence of environmental
- 577 forcings on the seasonality of dissolved oxygen and nutrients in the Bay of Bengal. *J. Mar. Res.* 65:
- 578 301-316.
- 579 Retrieved via <http://drs.nio.org/drs/handle/2264/623>

- 580
- 581 Savage, C. (2019). Seabird nutrients are assimilated by corals and enhance coral growth rates. *Sci.*
- 582 *Rep.* 9(1): 4284.
- 583 doi: 10.1038/s41598-01941030-6
- 584
- 585 Schwartz ML. (ed) (2005). Encyclopaedia of Coastal Science. Berlin: Springer. 1213p.
- 586
- 587 Scott A, Hardefeldt JM and Hall KC. (2014). Asexual propagation of sea anemones that host
- 588 anemonefishes: Implications for the marine ornamental aquarium trade and restocking programs. *PLoS*
- 589 *One* 9(10): e109566.
- 590 doi: 10.1371/journal.pone.0109566
- 591
- 592 Shariful F, Sedrati M, Ariffin EH, Shubri SM and Akhir MF. (2020). Impact of 2019 tropical storm
- 593 (Pabuk) on beach morphology, Terengganu coast (Malaysia). *J. Coast. Res.* 95(1) 346.
- 594 doi: 10.2112/SI95-067.1
- 595
- 596 Shazili NAM, Yunus K, Ahmad AS, Abdullah N and Rashid MKA. (2006). Heavy metal pollution
- 597 status in the Malaysian aquatic environment. *Aquat. Ecosyst. Health. Manag.* 9:137-145.
- 598 doi: 10.1080/14634980600724023
- 599
- 600 Steinberg RK, Dafforn KA, Ainsworth T and Johnston EL. (2020). Know thy anemone: A review of
- 601 threats to octocorals and anemones and opportunities for their restoration. *Front. Mar. Sci.* 7:590.
- 602 doi: 10.3389/fmars.2020.00590
- 603
- 604 Szczebak JT, Henry RP, Al-Horani FA and Chadwick NE. (2013). Anemonefish oxygenate their
- 605 anemone hosts at night. *J. Exp. Biol.* 216: 970-976.
- 606 doi: 10.1242/jeb.075648
- 607
- 608 Thomas L, Stat M, Kendrick GA and Hobbs JA. (2015). Severe loss of anemones and anemonefishes
- 609 from a premier tourist attraction at the Houtman Abrolhos Islands, Western Australia. *Mar. Biodivers.*
- 610 45:143-144.
- 611 doi: 10.1007/s12526-014-0242-3
- 612
- 613 Reef Check Malaysia. 2007 Annual Survey Report [Internet]:25 pages. Available from:
- 614 <https://static1.squarespace.com/static/5c9c815e348cd94acf3b352e/t/5e2724378ecd>
- 615 [a6054e753719/1579623503322/RCMSUR+2007.pdf](https://static1.squarespace.com/static/5c9c815e348cd94acf3b352e/t/5e2724378ecd/a6054e753719/1579623503322/RCMSUR+2007.pdf)

- 616
- 617 Reef Check Malaysia. Reef Check Malaysia Coral Reef Monitoring Report 2008 [Internet]:30 pages.
- 618 Available from: [https://static1.squarespace.com/static/5c9c815e348cd94acf3b352e/t/5e272416c179](https://static1.squarespace.com/static/5c9c815e348cd94acf3b352e/t/5e272416c179bf7b311363b0/1579623454468/RCMSUR+2008.pdf)
- 619 [bf7b311363b0/1579623454468/RCMSUR+2008.pdf](https://static1.squarespace.com/static/5c9c815e348cd94acf3b352e/t/5e272416c179bf7b311363b0/1579623454468/RCMSUR+2008.pdf)
- 620
- 621 Reef Check Malaysia. Status of Coral Reefs in Malaysia 2009 [Internet]:44 pages.
- 622 Available from:
- 623 [https://static1.squarespace.com/static/5c9c815e348cd94acf3b352e/t/5e2723cf3f5cf3](https://static1.squarespace.com/static/5c9c815e348cd94acf3b352e/t/5e2723cf3f5cf3703bd65bf5/1579623417862/RCMSUR+2009.pdf)
- 624 [703bd65bf5/1579623417862/RCMSUR+2009.pdf](https://static1.squarespace.com/static/5c9c815e348cd94acf3b352e/t/5e2723cf3f5cf3703bd65bf5/1579623417862/RCMSUR+2009.pdf)
- 625
- 626 Reef Check Malaysia. Reef Check Malaysia Annual Survey Report 2010 [Internet]:44 pages.
- 627 Available from:
- 628 [https://static1.squarespace.com/static/5c9c815e348cd94acf3b352e/t/5e27238ccc229](https://static1.squarespace.com/static/5c9c815e348cd94acf3b352e/t/5e27238ccc229c6d83af33da/1579623348093/RCMSUR+2010.pdf)
- 629 [c6d83af33da/1579623348093/RCMSUR+2010.pdf](https://static1.squarespace.com/static/5c9c815e348cd94acf3b352e/t/5e27238ccc229c6d83af33da/1579623348093/RCMSUR+2010.pdf)
- 630
- 631 Reef Check Malaysia. Status of Coral Reefs in Malaysia, 2011 [Internet]:37 pages.
- 632 Available from:
- 633 [https://static1.squarespace.com/static/5c9c815e348cd94acf3b352e/t/5e272353cc229](https://static1.squarespace.com/static/5c9c815e348cd94acf3b352e/t/5e272353cc229c6d83af29ef/1579623285798/RCMSUR+2011.pdf)
- 634 [c6d83af29ef/1579623285798/RCMSUR+2011.pdf](https://static1.squarespace.com/static/5c9c815e348cd94acf3b352e/t/5e272353cc229c6d83af29ef/1579623285798/RCMSUR+2011.pdf)
- 635
- 636 Reef Check Malaysia. Status of Coral Reefs in Malaysia, 2012 [Internet]:61 pages.
- 637 Available from:
- 638 [https://static1.squarespace.com/static/5c9c815e348cd94acf3b352e/t/5e27230a6a01](https://static1.squarespace.com/static/5c9c815e348cd94acf3b352e/t/5e27230a6a01722e910a2098/1579623197707/RCMSUR+2012.pdf)
- 639 [722e910a2098/1579623197707/RCMSUR+2012.pdf](https://static1.squarespace.com/static/5c9c815e348cd94acf3b352e/t/5e27230a6a01722e910a2098/1579623197707/RCMSUR+2012.pdf)
- 640
- 641 Reef Check Malaysia. Status of Coral Reefs in Malaysia, 2013 [Internet]:67 pages.
- 642 Available from:
- 643 [https://static1.squarespace.com/static/5c9c815e348cd94acf3b352e/t/5e2722c989aa](https://static1.squarespace.com/static/5c9c815e348cd94acf3b352e/t/5e2722c989aaea52421b9363/1579623120789/RCMSUR+2013.pdf)
- 644 [ea52421b9363/1579623120789/RCMSUR+2013.pdf](https://static1.squarespace.com/static/5c9c815e348cd94acf3b352e/t/5e2722c989aaea52421b9363/1579623120789/RCMSUR+2013.pdf)
- 645
- 646 Reef Check Malaysia. Status of Coral Reefs in Malaysia, 2014 [Internet]:73 pages.
- 647 Available from:
- 648 [https://static1.squarespace.com/static/5c9c815e348cd94acf3b352e/t/5e2722663ce1](https://static1.squarespace.com/static/5c9c815e348cd94acf3b352e/t/5e2722663ce1e84bb6b5bcf1/1579623037099/RCMSUR+2014.pdf)
- 649 [e84bb6b5bcf1/1579623037099/RCMSUR+2014.pdf](https://static1.squarespace.com/static/5c9c815e348cd94acf3b352e/t/5e2722663ce1e84bb6b5bcf1/1579623037099/RCMSUR+2014.pdf)
- 650
- 651 Reef Check Malaysia. Status of Coral Reefs in Malaysia, 2015 [Internet]:95 pages.



- 652 Available from:  
653 [https://static1.squarespace.com/static/5c9c815e348cd94acf3b352e/t/5d03584dfbd71](https://static1.squarespace.com/static/5c9c815e348cd94acf3b352e/t/5d03584dfbd7100001ea15b3/1560500326832/2015+Annual+Survey+Report.pdf)  
654 [00001ea15b3/1560500326832/2015+Annual+Survey+Report.pdf](https://static1.squarespace.com/static/5c9c815e348cd94acf3b352e/t/5d03584dfbd7100001ea15b3/1560500326832/2015+Annual+Survey+Report.pdf)  
655  
656 Reef Check Malaysia. Status of Coral Reefs in Malaysia, 2016 [Internet]:92 pages.  
657 Available from:  
658 [https://static1.squarespace.com/static/5c9c815e348cd94acf3b352e/t/5d035875fbd71](https://static1.squarespace.com/static/5c9c815e348cd94acf3b352e/t/5d035875fbd7100001ea1714/1560500363157/2016+Annual+Survey+Report.pdf)  
659 [00001ea1714/1560500363157/2016+Annual+Survey+Report.pdf](https://static1.squarespace.com/static/5c9c815e348cd94acf3b352e/t/5d035875fbd7100001ea1714/1560500363157/2016+Annual+Survey+Report.pdf)  
660  
661 Reef Check Malaysia. Status of Coral Reefs in Malaysia, 2017 [Internet]:98 pages.  
662 Available from:  
663 [https://static1.squarespace.com/static/5c9c815e348cd94acf3b352e/t/5d0358913864](https://static1.squarespace.com/static/5c9c815e348cd94acf3b352e/t/5d0358913864a6000181d6ce/1560500399102/2017+Annual+Survey+Report.pdf)  
664 [a6000181d6ce/1560500399102/2017+Annual+Survey+Report.pdf](https://static1.squarespace.com/static/5c9c815e348cd94acf3b352e/t/5d0358913864a6000181d6ce/1560500399102/2017+Annual+Survey+Report.pdf)  
665  
666 Reef Check Malaysia. Status of Coral Reefs in Malaysia, 2018 [Internet]:94 pages.  
667 Available from:  
668 [https://static1.squarespace.com/static/5c9c815e348cd94acf3b352e/t/5d0358b67240](https://static1.squarespace.com/static/5c9c815e348cd94acf3b352e/t/5d0358b672408300016b83e3/1560500436686/2018+Annual+Survey+Report.pdf)  
669 [8300016b83e3/1560500436686/2018+Annual+Survey+Report.pdf](https://static1.squarespace.com/static/5c9c815e348cd94acf3b352e/t/5d0358b672408300016b83e3/1560500436686/2018+Annual+Survey+Report.pdf)  
670  
671 Reef Check Malaysia. Status of Coral Reefs in Malaysia, 2019 [Internet]:87 pages.  
672 Available from:  
673 [https://static1.squarespace.com/static/5c9c815e348cd94acf3b352e/t/5e4e461750bc](https://static1.squarespace.com/static/5c9c815e348cd94acf3b352e/t/5e4e461750bc066ba303bbc5/1582188086832/2019+Annual+Survey+Report.pdf)  
674 [066ba303bbc5/1582188086832/2019+Annual+Survey+Report.pdf](https://static1.squarespace.com/static/5c9c815e348cd94acf3b352e/t/5e4e461750bc066ba303bbc5/1582188086832/2019+Annual+Survey+Report.pdf)  
675  
676 Reef Check Malaysia. Reef Check Malaysia Annual Survey Report 2010 (Internet):44 pages.  
677 Retrieved via:  
678 [https://static1.squarespace.com/static/5c9c815e348cd94acf3b352e/t/5e27238ccc229](https://static1.squarespace.com/static/5c9c815e348cd94acf3b352e/t/5e27238ccc229c6d83af33da/1579623348093/RCMSUR+2010.pdf)  
679 [c6d83af33da/1579623348093/RCMSUR+2010.pdf](https://static1.squarespace.com/static/5c9c815e348cd94acf3b352e/t/5e27238ccc229c6d83af33da/1579623348093/RCMSUR+2010.pdf)  
680  
681 Tkachenko KS, Wu B-J, Fang L-S and Fan T-Y. (2007). Dynamics of a coral reef community after  
682 mass mortality of branching *Acropora* corals and an outbreak of anemones. *Mar. Biol.* 151:185-194.  
683 doi: 10.1007/s00227-006-0467-1  
684  
685 Roopin M and Chadwick NE. (2009). Benefits to host sea anemones from ammonia contributions of  
686 resident anemonefish. *J. Exp. Mar. Biol. Ecol.* 370: 27-34.  
687 doi: 10.1016/j.jembe.2008.11.006
